# Supplementary material
Source: Springer Nature journal article supplement (https://www.springermedizin.de/resource/supplementary/12906_2009_300_MOESM2_ESM.pdf/9519370)

**Figure 2a. Effect of Tai Chi on Stress Outcomes.**

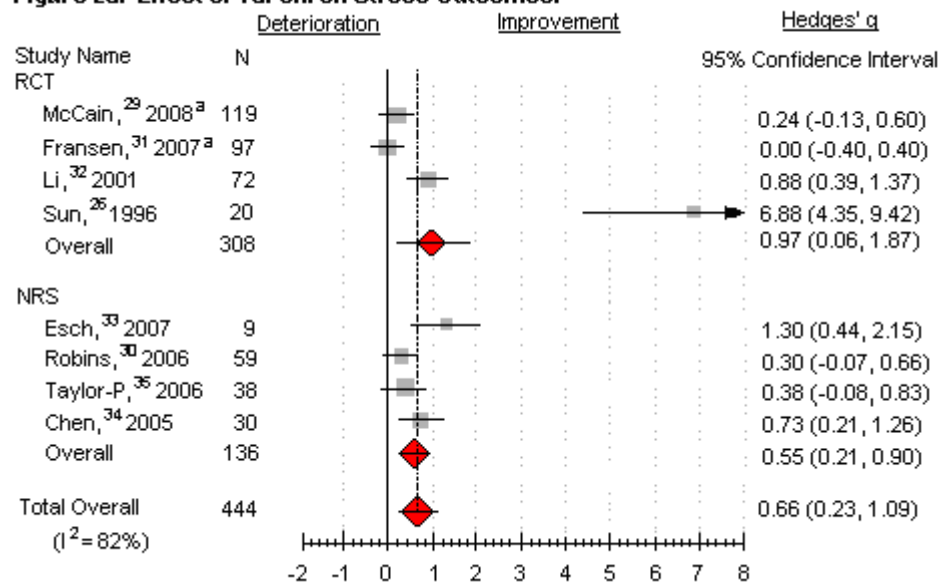

**Figure 2b. Effect of Tai Chi on Anxiety Outcomes.**

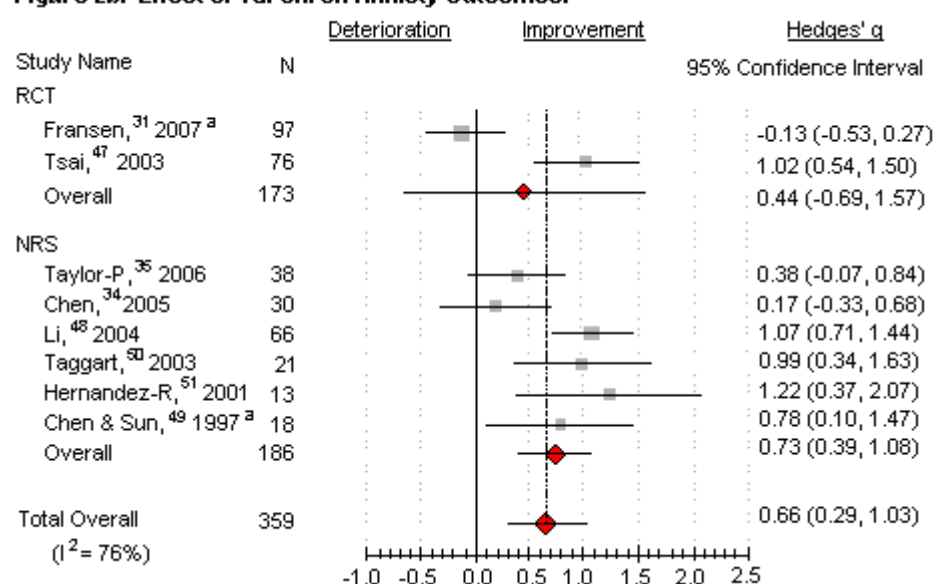

**Figure 2c. Effect of Tai Chi on Depression Outcomes.**

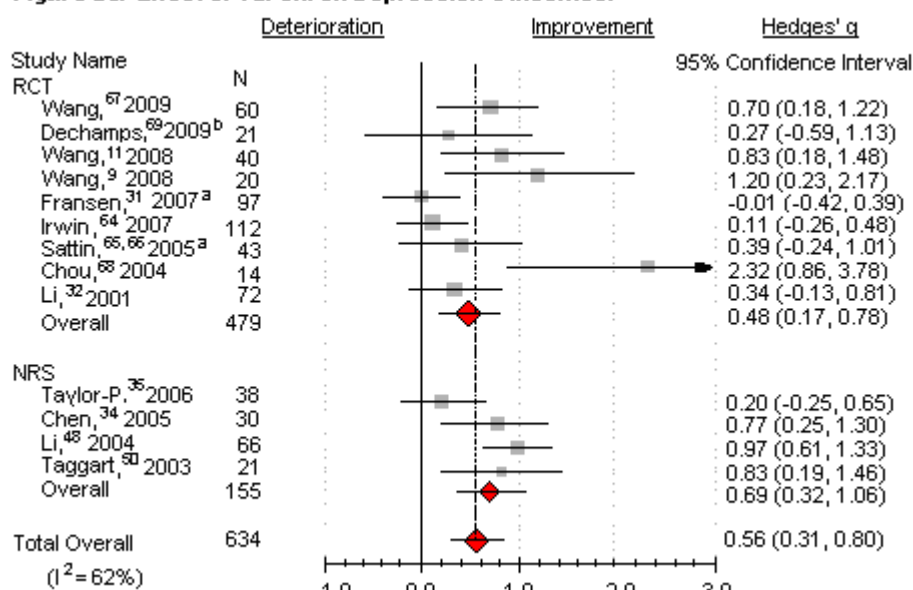

**Figure 2d. Effect of Tai chi on Mood Outcomes.**

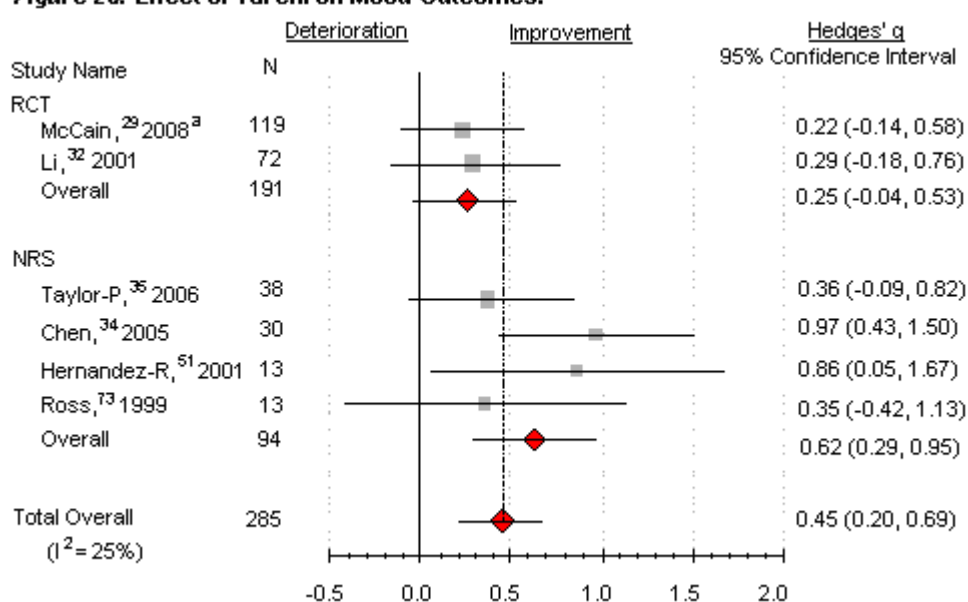

Supplement: MOESM2 [file 9519370]
